# Supplementary material for: Diagnostic utility of sub-maximum cardiopulmonary exercise testing in the ambulatory setting for heart failure with preserved ejection fraction
Source: PubMed Central journal article supplement — Pulm Circ. 2020 Nov 25;10(4):2045894020972273. doi: 10.1177/2045894020972273 (PMC7691918; doi:10.1177/2045894020972273), 2020-11-25
Supplement: sj-pdf-1-pul-10.1177_2045894020972273.pdf [file sj-pdf-1-pul-10.1177_2045894020972273.pdf]

Figure S1:

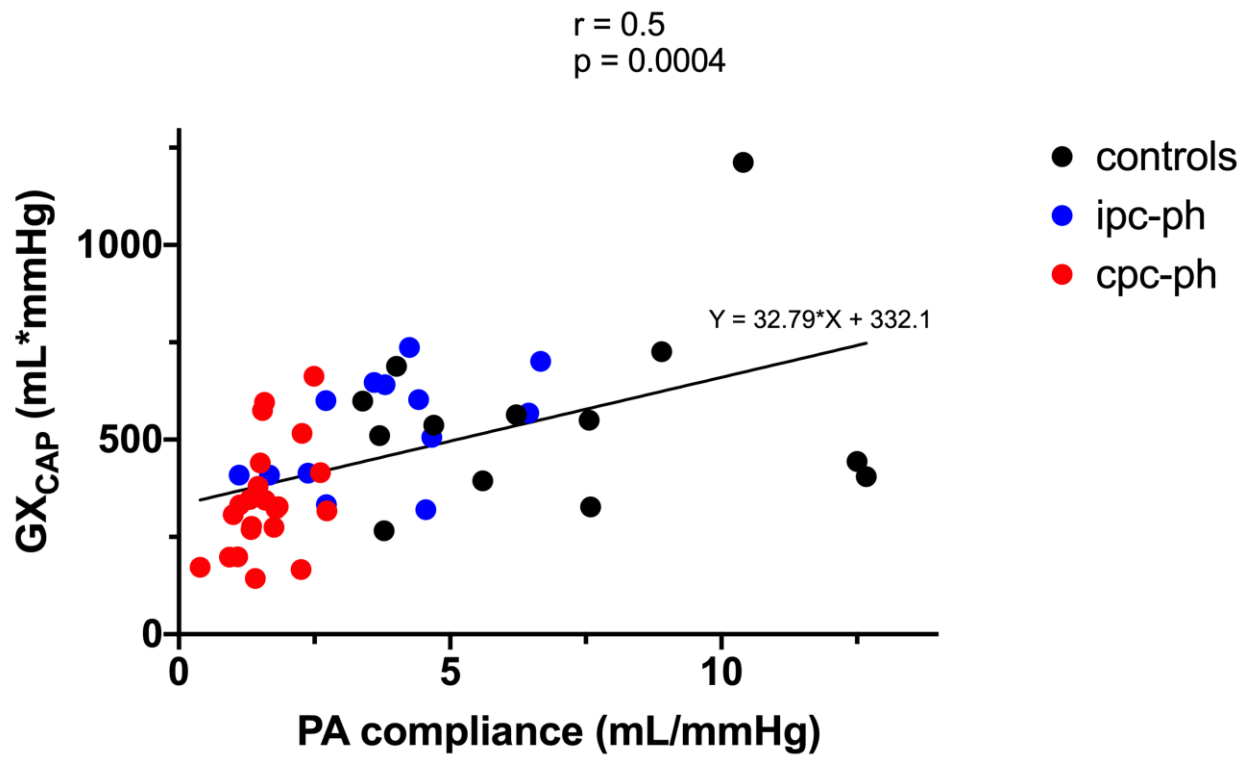

Figure S1: A scatter plot of gas exchange derived estimate of pulmonary vascular capacitance,  $GX_{CAP}$  and right heart catheterization study derived pulmonary artery (PA) compliance is shown.

Table S1: Diagnosis of control subjects

| <b>Control subject</b> | <b>Diagnosis</b>                                            |
|------------------------|-------------------------------------------------------------|
| 1                      | Systemic sclerosis associated dysautonomia                  |
| 2                      | Dysautonomia                                                |
| 3                      | History of inflammatory arthritis                           |
| 4                      | History of systemic sclerosis                               |
| 5                      | Hereditary hemorrhagic telangiectasia                       |
| 6                      | History of Raynaud's                                        |
| 7                      | History of rheumatoid arthritis                             |
| 8                      | Lyme disease associated dysautonomia                        |
| 9                      | Dysautonomia                                                |
| 10                     | Dysautonomia                                                |
| 11                     | History of systemic sclerosis                               |
| 12                     | History of systemic sclerosis                               |
| 13                     | History of inflammatory arthritis                           |
| 14                     | History of systemic sclerosis                               |
| 15                     | History of systemic sclerosis                               |
| 16                     | History of recurrent thrombo-embolism with negative VQ scan |
| 17                     | History of multiple myeloma                                 |
| 18                     | Dysautonomia                                                |

VQ – ventilation perfusion

Dysautonomia includes clinically suspected postural orthostatic hypotension (POTS), dysautonomia and/or orthostatic hypotension, with or without confirmative skin biopsy.

Table S2: Univariate model for predicting extrapolated  $VO_2$  (%predicted) in HFpEF using sub-maximum CPET derived variables

| <b>Variable</b>       | <b><math>\beta</math>-coefficient</b> | <b>p-value</b> | <b>95% confidence interval</b> |
|-----------------------|---------------------------------------|----------------|--------------------------------|
| Delta $ETCO_2$ (mmHg) | 8.01                                  | 0.01           | 1.96 – 14.05                   |
| Rest $ETCO_2$ (mmHg)  | 1.64                                  | 0.62           | -5.03 – 8.31                   |
| $GX_{CAP}$ (mL*mmHg)  | 8.78                                  | 0.01           | 2.26 – 15.29                   |
| $VE/VCO_2$            | -7.32                                 | 0.01           | -13.3 - -1.32                  |

Abbreviations are: CPET – cardiopulmonary exercise test;  $VO_2$  – oxygen consumption;  $ETCO_2$  – end tidal carbon dioxide;  $GX_{CAP}$  – gas exchange derived pulmonary vascular capacitance;  $VE/VCO_2$  - ventilatory efficiency.
